# Supplementary material for: Two membrane-bound transcription factors regulate expression of various type-IV-pili surface structures in Sulfolobus acidocaldarius
Source: PeerJ. 2019 Feb 26;7:e6459. doi: 10.7717/peerj.6459 (PMC6396743; doi:10.7717/peerj.6459)
Supplement: Supplemental Information 2 — File containing all the raw data for the experiments shown in the manuscript [file peerj-07-6459-s002.xlsx]

## Sheet: Figure 3
				Figure

## Sheet: Figure 4
				MST with pflaB41										MST with ArnR box-1												MST with ArnR box-2
			ArnR	replicate 1				replicate 2						ArnR	replicate 1				replicate 2							ArnR	replicate 1				replicate 2
				µM	net fluoresence			µM							µM	net fluoresence			µM								µM	net fluoresence			µM
				0.156	724.18	709.592		0.156	715.69	721.366					0.156	842.897	845.162		0.156	846.699	847.708						0.156	846.535	848.636		0.156	845.353	846.711
				0.312	726.493	692.704		0.312	715.143	808.284					0.312	843.393	845.855		0.312	845.886	847.702						0.312	845.895	847.288		0.312	844.855	846.811
				0.625	730.995	706.044		0.625	728.222	717.643					0.625	841.89	842.062		0.625	845.348	846.118						0.625	844.927	846.722		0.625	843.94	845.649
				1.25	734.159	715.683		1.25	743.88	751.93					1.25	841.8	845.067		1.25	845.592	847.592						1.25	846.288	846.116		1.25	843.318	844.468
				2.5	765.945	726.642		2.5	780.605	767.803					2.5	843.813	844.548		2.5	846.641	847.12						2.5	846.566	846.737		2.5	842.82	846.963
				5	779.404	743.053		5	764.348	749.117					5	859.067	842.962		5	846.155	847.615						5	848.05	847.185		5	845.853	847.634
				10	795.146	762.036		10	806.053	790.442					10	842.429	843.913		10	847.266	847.971						10	845.964	848.545		10	848.077	846.663
				12	798.524	781.795		12	779.666	869.165					12	842.969	846.301		12	848.614	849.497						12	845.755	848.29		12	850.7	850.099
				15	802.163	785.817		15	812.058	791.721					15	843.957	843.688		15	846.948	847.39						15	847.244	848.943		15	851.525	851.904
				18.7	805.616	787.098		18.7	780.833	834.088					18.7	843.947	845.422		18.7	847.657	847.558						18.7	848.392	849.022		18.7	849.847	850.333
			ArnR1	replicate 1				replicate 2						ArnR1	replicate 1				replicate 2							ArnR1	replicate 1				replicate 2
				µM				µM							µM				µM								µM				µM
				0.156	847.799	844.269		0.156	719.96	726.537					0.156	841.423	842.905		0.156	843.851	844.382						0.156	844.043	845.003		0.156	846.341	846.953
				0.312	845.483	814.972		0.312	730.349	732.548					0.312	841.228	843.666		0.312	843.371	843.316						0.312	843.33	842.575		0.312	844.619	846.054
				0.625	846.314	841.832		0.625	747.402	757.495					0.625	842.33	843.432		0.625	843.037	843.705						0.625	843.336	842.425		0.625	845.181	846.873
				1.25	847.314	844.703		1.25	775.337	787.685					1.25	839.531	840.394		1.25	843.902	844.047						1.25	852.715	852.936		1.25	844.493	846.21
				2.5	848.005	851.625		2.5	782.395	789.574					2.5	838.672	839.925		2.5	844.11	844.727						2.5	842.635	843.33		2.5	845.867	846.779
				5	852.216	863.72		5	813.213	804.371					5	842.658	843.251		5	844.611	845.62						5	843.154	844.976		5	846.664	848.93
				10	855.303	878.605		10	816.108	807.342					10	840.536	841.631		10	844.586	844.823						10	844.055	844.519		10	849.402	849.359
				12	858.953	877.529		12	825.158	838.196					12	842.718	843.71		12	844.532	846.088						12	842.949	844.032		12	850.39	852.231
				15	875.126	872.563		15	1035.13	826.296					15	840.181	843.376		15	845.254	845.431						15	842.841	844.793		15	850.027	849.549
				18	890.562	853.26		18	797.441	835.898					18	843.37	844.456		18	845.982	847.155						18	846.503	847.619		18	850.221	850.643

## Sheet: Figure 5
				MST with paapF										MST with pupsX												MST with ArnR p_Saci2122
			ArnR	replicate 1				replicate 2						ArnR	replicate 1				replicate 2							ArnR	replicate 1				replicate 2
				µM	net fluoresence			µM							µM	net fluoresence			µM								µM	net fluoresence			µM
				0.156	838.115	830.489		0.156	741.944	742.708					0.156	718.397	714.493		0.156	831.864	833.234						0.156	836.445	837.041		0.156	824.917	840.437
				0.312	844.299	835.246		0.312	749.975	740.907					0.312	711.837	712.025		0.312	832.656	830.82						0.312	835.706	835.861		0.312	824.157	839.704
				0.625	835.628	848.222		0.625	788.943	756.547					0.625	710.632	709.951		0.625	832.976	831.572						0.625	835.952	836.082		0.625	823.845	839.079
				1.25	856.948	866.079		1.25	781.914	843.247					1.25	714.513	714.71		1.25	824.564	828.097						1.25	827.533	844.006		1.25	822.515	841.143
				2.5	865.033	900.778		2.5	823.392	863.894					2.5	719.984	724.352		2.5	840.325	830.289						2.5	837.099	837.102		2.5	822.199	839.748
				5	944.161	893.058		5	808.86	751.948					5	720.872	730.863		5	830.127	846.917						5	835.942	836.483		5	837.772	840.346
				10	909.205	918.624		10	803.598	793.469					10	734.201	739.332		10	879.526	841.78						10	837.851	836.633		10	824.891	841.187
				12	1014.61	930.934		12	806.041	778.572					12	738.244	752.369		12	881.614	834.07						12	837.042	836.845		12	823.348	840.527
				15	921.363	904.7		15	805.291	814.243					15	747.694	769.615		15	839.278	892.206						15	837.744	837.438		15	825.383	840.147
				18.7	1041.57	903.259		18.7	785.969	805.152					18.7	756.874	754.473		18.7	869.613	908.193						18.7	838.427	837.551		18.7	825.628	845.296
			ArnR1	replicate 1				replicate 2						ArnR1	replicate 1				replicate 2							ArnR1	replicate 1				replicate 2
				µM				µM							µM				µM								µM				µM
				0.156	854.496	857.733		0.156	859.173	860.363					0.156	843.719	843.77		0.156	857.587	859.554						0.156	848.015	853.635		0.156	841.531	843.167
				0.312	855.484	856.868		0.312	859.2	859.412					0.312	843.167	844.828		0.312	856.78	857.431						0.312	848.448	853.059		0.312	840.531	843.505
				0.625	854.987	856.494		0.625	856.785	859.891					0.625	843.561	845.534		0.625	857.973	858.563						0.625	855.682	854.575		0.625	838.442	840.986
				1.25	859.709	859.485		1.25	855.86	859.077					1.25	843.807	845.271		1.25	856.081	857.487						1.25	845.147	853.361		1.25	840.047	841.679
				2.5	856.615	858.501		2.5	857.717	860.606					2.5	844.063	846.198		2.5	856.058	856.825						2.5	851.611	852.681		2.5	838.956	840.852
				5	856.244	857.514		5	858.801	860.795					5	842.866	844.454		5	857.16	858.779						5	851.833	853.809		5	841.02	844.84
				10	858.021	859.528		10	858.84	861.321					10	843.858	846.967		10	857.867	859.045						10	845.387	852.717		10	840.022	845.398
				12	859.308	860.7		12	860.068	860.46					12	843.841	846.021		12	858.155	859.508						12	849.441	852.621		12	840.675	842.647
				15	862.082	862.613		15	859.521	860.093					15	844.083	847.139		15	858.559	860.14						15	854.752	855.292		15	842.13	843.792
				18	865.261	867.682		18	862.498	863.392					18	843.622	847.514		18	859.319	860.643						18	846.718	850.446		18	841.074	846.142

## Sheet: Figure 6
Sample	Cq		Cq		Cq		Cq		Cq		Cq
adh t0 MW001	22.0994		22.5506		22.4829		22.9206		22.6633		22.0225		MW001 = wild type S. acidocaldarius
adh t0 MW001	22.0771		22.525		22.512		22.9565		22.9448		22.0846		MW328= MW001 dArnR
adh t0 MW001	22.0881		22.6211		22.5546		22.9009		22.9283		22.0296		MW330= MW001 dArnR1
adh t2 MW001			22.2497		22.473		22.9142		22.8398		21.9954
adh t2 MW001	22.1225		22.4946		22.4813		22.9674		22.964		22.0348
adh t2 MW001	22.0868		22.7581		22.508		22.8866		22.9908		22.0274
aapF t0 MW001	20.1561		20.5322		19.4928		20.0934		17.8827		20.1247
aapF t0 MW001	20.1273		20.7277		19.496		20.0388		19.1755		20.1657
aapF t0 MW001	20.1237		21.4111		19.5382		20.0948		18.0967		21.0098
aapF t2 MW001	15.623		16.254		15.1782		16.33		17.7886		16.4116
aapF t2 MW001	15.6945		16.8078		15.2017		15.5252		17.4204		15.7389
aapF t2 MW001	15.6727		16.1444		15.1626		15.5559		17.5068		15.6973
upsX t0 MW001	24.6313		24.1432		22.6714		22.7366		25.2846		23.7509
upsX t0 MW001	23.9276		24.022		22.8717		22.7984		25.3834		23.0247
upsX t0 MW001	23.7955		24.2601		4.6495		22.8245		25.5641		23.7671
upsX t2 MW001	21.9249		21.8404		4.29764		20.0769		23.2225		21.0919
upsX t2 MW001	21.9974		21.3501		20.6561		20.0932		23.1005		21.0463
upsX t2 MW001	21.9459		22.0783		20.538		20.1301		23.1439		21.0789
adh t0 MW328	22.1162		22.5994		22.463		22.9684		23.0561		22.0149
adh t0 MW328	22.1355		22.2307		22.5122		22.8823		22.7894		22.0077
adh t0 MW328	22.1197		22.5177		22.5861		22.9		22.8675		22.0063
adh t2 MW328	22.1071		22.9385		22.5314		23.0083		22.9037		22.0125
adh t2 MW328	22.1183		22.8265		22.4343		22.891		22.8883		22.0114
adh t2 MW328	22.1141		22.3716		22.4328		22.8517		23.1668		22.0247
aapF t0 MW328	15.6005		14.9238		15.0397		14.5991		17.3758		14.8332
aapF t0 MW328	14.7121		14.7907		15.0939		14.6532		17.4512		14.8532
aapF t0 MW328	14.7206		15.0863		15.0875		14.6124		17.5621		14.8475
aapF t2 MW328	20.0633		20.0838		19.4471		19.1284		16.9977		19.206
aapF t2 MW328	19.1784		20.0418		19.4092		19.0916		17.0571		19.2485
aapF t2 MW328	19.1964		20.0491		19.4204		19.1348		17.2882		19.2056
upsX t0 MW328	22.8373		22.0358		21.4681		21.0225		23.0095		22.0167
upsX t0 MW328	22.8022		21.7484		21.602		21.0368		23.069		22.0103
upsX t0 MW328	22.8649		22.4721		22.2289		21.0808		22.9132		22.0233
upsX t2 MW328	26.5514		27.085		26.001		24.8099		23.8326		25.6724
upsX t2 MW328	26.5632		26.9461		26.1217		24.6212		23.4162		25.6626
upsX t2 MW328	26.4925		26.2767		26.1303		24.7235		24.0862		25.6783
adh t0 MW330	22.2651		22.3739		22.3496		22.4218		22.3481		23.5895
adh t0 MW330	22.5568		22.2607		22.1603		22.4397		22.4538		22.6253
adh t0 MW330	22.3199		22.1674		22.3181		22.8002		22.4014		22.4437
adh t2 MW330	22.2875		22.2593		21.9138		22.376		22.178		22.2413
adh t2 MW330	22.308		22.3682		22.1642		22.3449		22.494		22.2998
adh t2 MW330	20.0573		22.1819		22.1194		22.2741		22.4463		22.6213
aapF t0 MW330	20.1881		20.2215		20.3601		20.1111		19.3342		22.0029
aapF t0 MW330	20.0056		20.2072		20.1527		20.4832		19.1503		20.2106
aapF t0 MW330			20.399		20.4293		20.6118		18.8356		20.4228
aapF t2 MW330	19.0947		19.3486		19.045		19.4344		20.2419		19.4743
aapF t2 MW330	19.2568		19.0576		19.1495		19.6034		20.2553		19.1549
aapF t2 MW330	18.7666		19.099		19.1589		19.3572		20.0822		19.8766
upsX t0 MW330	25.1129		25.3725		25.2428		25.6928		23.7177		25.6073
upsX t0 MW330	25.2473		25.5043		25.4166		25.4911		23.9003		25.7491
upsX t0 MW330	25.3132		25.108		25.175		25.728		23.5747		25.8064
upsX t2 MW330	23.6647		23.9595		23.5294		23.947		25.6068		24.0349
upsX t2 MW330	23.4499		23.6122		23.6861		23.9331		25.2583		24.0256
upsX t2 MW330	23.5532		23.6523		23.5821		23.9449		25.2704		24.0314
